# Supplementary material for: Molecular analysis of pediatric brain tumors identifies microRNAs in pilocytic astrocytomas that target the MAPK and NF-κB pathways
Source: Springer Nature journal article supplement (doi:10.1186/s40478-015-0266-3), 2015-12-01
Supplement: MOESM5 [file 25665850]

a.

| Gene         | Forward Primer          | Reverse Primer          | Exons | Size  |
|--------------|-------------------------|-------------------------|-------|-------|
| IGFBP7       | GCGAGCAAGGTCCTTCATA     | GGGATTCCGATGACCTCACA    | 1-2   | 92bp  |
| CDKN2A (p16) | CCAACGCACCGAATAGTTACG   | GCGCTGCCCATCATCATG      | 1-2   | 57bp  |
| IL6          | AATTCGGTACATCCTCGACGG   | TTGGAAGGTTCAGGTTGTTTTCT | 2-3   | 111bp |
| IL8          | AAGGAAAAGTGGGTGCAGAG    | ATTGCATCTGGCAACCCTAC    | 3-4   | 176bp |
| CDKN1A (p21) | TGTCCGTCAGAACCCATGC     | AAAGTCGAAGTCCATCGCTC    | 1-2   | 138bp |
| CTCF         | GAGAAGCCATTCAAGTGTTCCAT | CTCCAGTATGAGAGCGAATGTGA | 5-6   | 85bp  |
| TBP          | CACGAACCACGGCACTGATT    | TTTTCTTGCTGCCAGTCTGGAC  | 5-6   | 88bp  |

b.

| Primer                                     | Primer Sequence        |
|--------------------------------------------|------------------------|
| <b><i>KIAA1549-BRAF</i> fusion primers</b> |                        |
| KIAA1549 nested 1 exon 12                  | GAGGGACGCAGGAGATAAGA   |
| KIAA1549 nested 2 exon 14-15               | CCAGGAAGAGCTCACGGATA   |
| BRAF nested 1 exon 13-14                   | AAGTAATCCATGCCCTGTGC   |
| BRAF nested 2 exon 12                      | TGCTGAGGTGTAGGTGCTGT   |
| <b><i>BRAF V600E</i> - sequencing</b>      |                        |
| BRAFV600E F exon 15                        | TGCTTGCTCTGATAGGAAAATG |
| BRAFV600E R exon 15                        | CCACAAAATGGATCCAGACA   |
