# Supplementary material for: Molecular analysis of pediatric brain tumors identifies microRNAs in pilocytic astrocytomas that target the MAPK and NF-κB pathways
Source: Springer Nature journal article supplement (doi:10.1186/s40478-015-0266-3), 2015-12-01
Supplement: MOESM6 [file 25665850]

**a.**

| <b>Upstream Regulator</b> | <b>Activation z-score</b> | <b>p-value overlap</b> |
|---------------------------|---------------------------|------------------------|
| NFkB (complex)            | 7.008                     | 4.73E-22               |
| TP53                      | 6.166                     | 7.68E-42               |
| IRF7                      | 5.953                     | 6.69E-17               |
| STAT3                     | 5.916                     | 1.71E-34               |
| SP1                       | 5.785                     | 1.11E-16               |
| CTNNB1                    | 5.498                     | 5.10E-26               |
| STAT4                     | 5.333                     | 5.87E-09               |
| HIF1A                     | 5.22                      | 1.65E-12               |
| STAT1                     | 5.157                     | 5.10E-24               |
| SMAD3                     | 5.062                     | 5.21E-16               |
| SIM1                      | 4.99                      | 6.76E-06               |
| ARNT2                     | 4.796                     | 3.75E-05               |
| MTPN                      | 4.42                      | 3.36E-11               |
| GLI1                      | 4.417                     | 1.58E-09               |
| MITF                      | 4.361                     | 9.92E-06               |
| CEBPB                     | 4.308                     | 5.98E-24               |
| IRF1                      | 4.287                     | 1.55E-15               |
| TP73                      | 4.118                     | 1.09E-09               |
| IRF3                      | 4.11                      | 7.27E-13               |
| NFKB1A                    | 4.057                     | 1.63E-29               |
| BRCA1                     | 4.016                     | 4.25E-08               |
| ERG                       | 3.999                     | 1.57E-08               |
| JUN                       | 3.872                     | 7.93E-21               |
| RELA                      | 3.811                     | 7.04E-14               |
| ETS1                      | 3.757                     | 1.80E-08               |
| CREB1                     | 3.754                     | 1.97E-10               |
| PGR                       | 3.737                     | 1.60E-12               |
| CREBBP                    | 3.625                     | 6.29E-09               |
| NFATC2                    | 3.583                     | 5.11E-10               |
| SMAD4                     | 3.565                     | 9.33E-17               |
| Ap1                       | 3.361                     | 8.30E-08               |
| IFI16                     | 3.329                     | 2.71E-06               |
| SMAD1                     | 3.273                     | 4.63E-10               |
| STAT                      | 3.25                      | 2.17E-08               |
| CEBPA                     | 3.191                     | 4.55E-18               |
| EP300                     | 3.133                     | 1.79E-06               |
| SRF                       | 3.127                     | 8.36E-06               |
| EPAS1                     | 3.073                     | 4.09E-07               |
| FOXO3                     | 3.07                      | 7.18E-09               |
| IRF5                      | 3.044                     | 1.16E-06               |
| SMAD2                     | 2.97                      | 2.39E-06               |
| REL                       | 2.874                     | 1.67E-07               |
| NFE2L2                    | 2.854                     | 4.53E-05               |
| KLF4                      | 2.823                     | 4.72E-08               |

|                      |       |          |
|----------------------|-------|----------|
| SP1                  | 2.816 | 8.67E-13 |
| TFEB                 | 2.804 | 4.18E-05 |
| SMARCB1              | 2.801 | 2.58E-05 |
| NFKB1                | 2.788 | 4.71E-10 |
| Smad2/3-Smad4        | 2.779 | 2.22E-07 |
| SMARCA4              | 2.761 | 2.61E-24 |
| EGR1                 | 2.731 | 7.18E-09 |
| HTT                  | 2.714 | 8.34E-09 |
| NR3C2                | 2.678 | 9.98E-06 |
| T, brachyury homolog | 2.646 | 3.69E-06 |
| SMARCD3              | 2.646 | 1.41E-05 |
| ETS2                 | 2.639 | 1.80E-07 |
| STAT2                | 2.604 | 6.00E-08 |
| PML                  | 2.538 | 2.43E-08 |
| GATA                 | 2.52  | 2.03E-10 |
| WT1                  | 2.469 | 9.34E-06 |
| ZBTB17               | 2.433 | 1.02E-06 |
| Notch                | 2.395 | 1.71E-12 |
| NLRC5                | 2.364 | 2.54E-11 |
| NFYA                 | 2.36  | 9.89E-09 |
| AR                   | 2.34  | 1.04E-10 |
| Smad                 | 2.271 | 4.39E-08 |
| MKL1                 | 2.216 | 6.45E-07 |
| FOXO4                | 2.204 | 1.00E-05 |
| TCF3                 | 2.196 | 1.29E-05 |
| ELK1                 | 2.119 | 5.53E-09 |
| CIITA                | 2.075 | 5.25E-11 |
| STAT5A               | 2.024 | 2.27E-06 |

**b.**

| <b>Upstream Regulator</b> | <b>Activation z-score</b> | <b>p-value overlap</b> |
|---------------------------|---------------------------|------------------------|
| TRIM24                    | -4.737                    | 3.00E-12               |
| SMAD7                     | -3.927                    | 1.49E-15               |
| HOXA10                    | -3.909                    | 6.66E-11               |
| SPDEF                     | -3.748                    | 8.50E-13               |
| MYCN                      | -3.721                    | 1.71E-09               |
| IKZF1                     | -3.459                    | 2.51E-07               |
| NKX2-3                    | -3.297                    | 2.95E-23               |
| estrogen receptor         | -3.128                    | 1.86E-22               |
| GFI1                      | -3.052                    | 5.12E-07               |
| ID3                       | -2.982                    | 5.58E-05               |
| KLF2                      | -2.913                    | 1.31E-18               |
| ZNF217                    | -2.891                    | 1.30E-09               |
| MYC                       | -2.742                    | 9.13E-35               |
| HDAC1                     | -2.595                    | 1.79E-06               |

|         |        |          |
|---------|--------|----------|
| Nr1h    | -2.503 | 5.55E-08 |
| PCGF2   | -2.367 | 1.32E-04 |
| NEUROG1 | -2.309 | 2.16E-05 |
| IRF4    | -2.274 | 1.21E-04 |
| GLIS2   | -2.219 | 6.24E-06 |
| CNOT7   | -2.213 | 1.91E-09 |
| NAB2    | -2.213 | 8.42E-04 |
| RUNX3   | -2.213 | 1.94E-02 |
| ZFP36   | -2.202 | 3.36E-03 |
| ID2     | -2.200 | 2.35E-03 |
| Rb      | -2.177 | 1.03E-02 |
| TSC22D3 | -2.157 | 3.22E-05 |
| HES1    | -2.003 | 3.51E-05 |
| MNT     | -2.000 | 1.10E-03 |

---
